# Supplementary material
Source: publisher site journal article supplement (https://www.kjim.org/upload/media/kjim-2017-194-suppl5.pdf)
Supplement: Supplementary file 1 [file kjim-2017-194-suppl5.pdf]

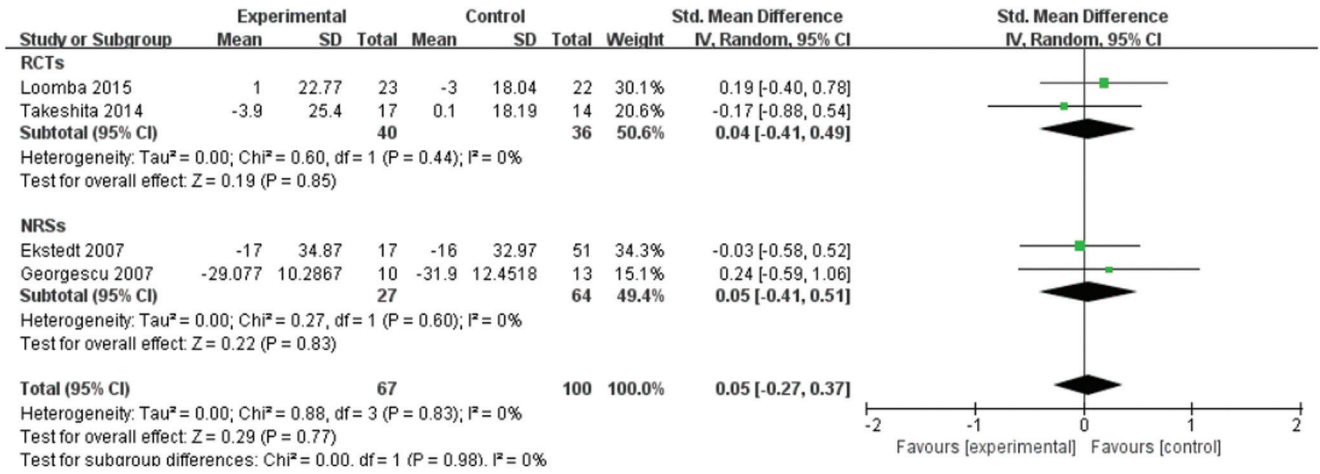

**Supplementary Figure 2.** Forest plot for decrease of serum alanine aminotransferase (ALT). SD, standard deviation; IV, interval variable; CI, confidence interval; Std., standardized; RCT, randomized controlled trial; NRS, nonrandomized study.
